# Supplementary material for: Inhibition of insulin amyloid fibrillization by glyco-acridines: anin vitroandin silicostudy
Source: Royal Society of Chemistry journal article supplement (doi:10.1039/c5md00004a), 2015-01-01
Supplement: c5md00004a1.pdf [file c5md00004a1.pdf]

## SUPPORTING INFORMATION

# Inhibition of Insulin Amyloid Fibrillization by Glyco-Acridines: *In vitro* and *in silico* study

Quan Van Vuong<sup>a</sup> ‡, Zuzana Bednarikova<sup>b,c</sup> ‡, Andrea Antosova<sup>b</sup>, Pham Dinh Quoc Huy<sup>a,d</sup>,  
Katarina Siposova<sup>b</sup>, Nguyen Anh Tuan<sup>e</sup>, Mai Suan Li<sup>a,d</sup>\*, \* and Zuzana Gazova<sup>b\*</sup>

<sup>a</sup> Institute for Computational Science and Technology, Tan Chanh Hiep Ward, District 12, Ho Chi Minh City, Vietnam

<sup>b</sup> Department of Biophysics, Institute of Experimental Physics, Slovak Academy of Sciences, Watsonova 47, 040 01 Kosice, Slovakia

<sup>c</sup> Department of Biochemistry, Faculty of Chemistry, Safarik University, Moyzesova 11, 041 54 Kosice, Slovakia

<sup>d</sup> Institute of Physics, Polish Academy of Sciences, Al. Lotnikow 32/46, 02-668 Warsaw, Poland

<sup>e</sup> University of Science - VNUHCM, Ho Chi Minh City, Vietnam

‡These authors contribute equally to this work

\*Corresponding authors: [gazova@saske.sk](mailto:gazova@saske.sk), [masli@ifpan.edu.pl](mailto:masli@ifpan.edu.pl)

**Table S1.** Chemical composition and formula of studied glyco-acridines.

| <b>Thiosemicarbazides</b>                                                                                                                                       |                                                                                                                                                                   |
|-----------------------------------------------------------------------------------------------------------------------------------------------------------------|-------------------------------------------------------------------------------------------------------------------------------------------------------------------|
| 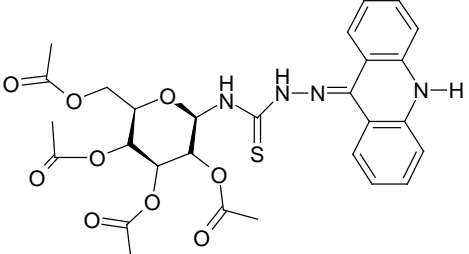                                                                               |                                                                                 |
| <p><b>T1</b><br/>4-(2,3,4,6-Tetra-<i>O</i>-acetyl-<math>\beta</math>-D-glucopyranosyl)-1-(9,10-dihydroacridin-9-ylidene)thiosemicarbazide</p>                   | <p><b>T1OH</b><br/>4-(<math>\beta</math>-D-glucopyranos-1-yl)-1-(9,10-dihydroacridin-9-ylidene)thiosemicarbazide</p>                                              |
|                                                                               |                                                                                                                                                                   |
| <p><b>T2</b><br/>4-(2,3,4,6-Tetra-<i>O</i>-acetyl-<math>\beta</math>-D-galactopyranosyl)-1-(9,10-dihydroacridin-9-ylidene)thiosemicarbazide</p>                 |                                                                                                                                                                   |
| <b>Cyclic 1,3-thiazolidinones</b>                                                                                                                               |                                                                                                                                                                   |
|                                                                              |                                                                               |
| <p><b>C1</b><br/>2'-(9,10-Dihydroacridin-9-ylidene)hydrazono-3'-(2,3,4,6-tetra-<i>O</i>-acetyl-<math>\beta</math>-D-glucopyranosyl)-1',3'-thiazolidin-4-one</p> | <p><b>C2</b><br/>2'-(9,10-Dihydroacridin-9-ylidene)hydrazono-3'-(2,3,4,6-tetra-<i>O</i>-acetyl-<math>\beta</math>-D-galactopyranosyl)-1',3'-thiazolidin-4-one</p> |

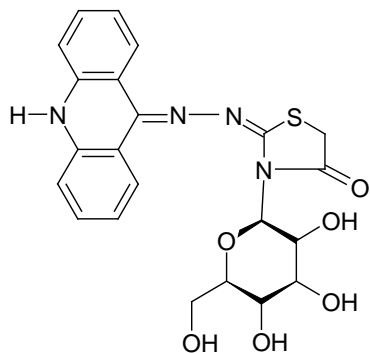

**C2OH**

2'-(9,10-Dihydroacridin-9-ylidene)hydrazono-3'-( $\beta$ -D-galactopyranos-1-yl)-1',3'-thiazolidin-4-one

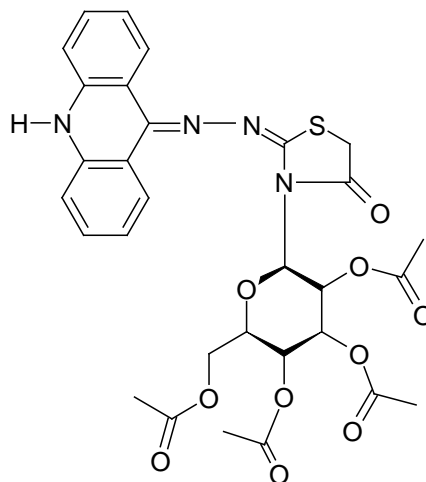

**C3**

2'-(9,10-Dihydroacridin-9-ylidene)hydrazono-3'-(2,3,4,6-tetra-*O*-acetyl- $\beta$ -D-manopyranosyl)-1',3'-thiazolidin-4-one

**Isothiosemicarbazides**

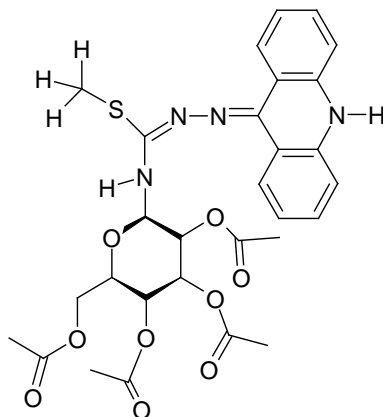

**I1**

*S*-Methyl-1-(9,10-dihydroacridin-9-ylidene)-4-(2,3,4,6-tetra-*O*-acetyl- $\beta$ -D-glucopyranosyl)isothiosemicarbazide

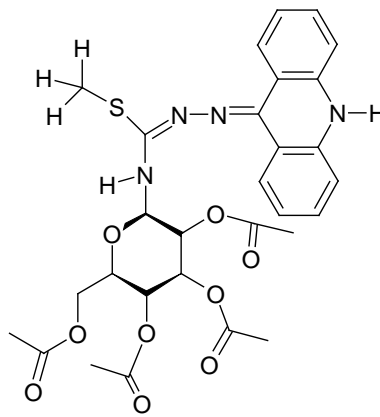

**I2**

*S*-Methyl-1-(9,10-dihydroacridin-9-ylidene)-4-(2,3,4,6-tetra-*O*-acetyl- $\beta$ -D-galactopyranosyl)isothiosemicarbazide

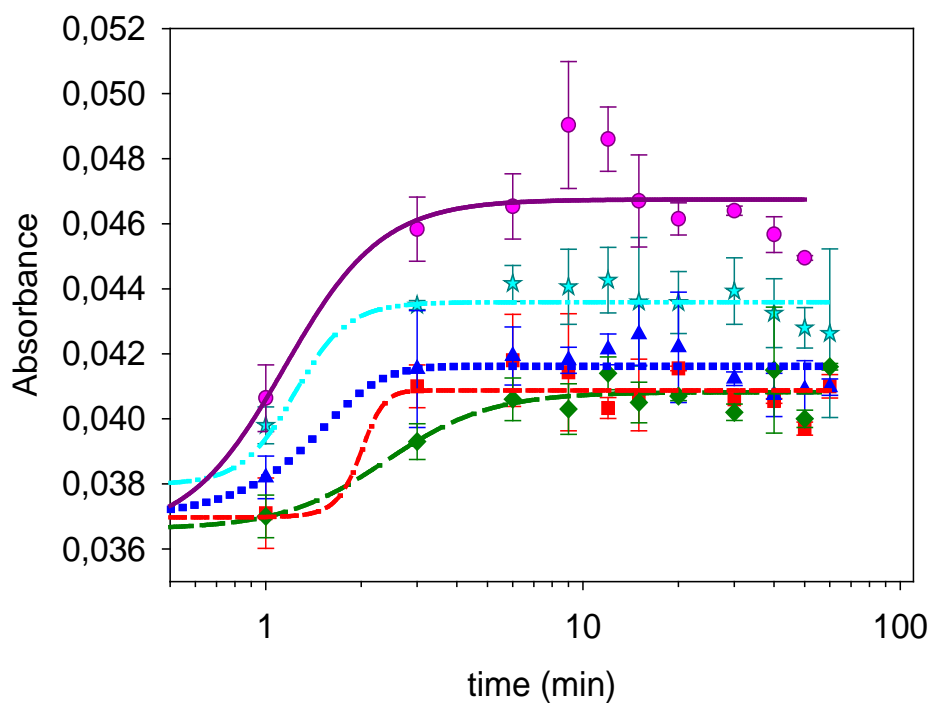

**Figure S1.** The kinetics of insulin fibrillization alone and in presence of glyco-acridine T1OH (cyan dash dot dot line), T2 (blue dot line), C1 (red dash line) or I1 (green long dash line) observed by changes in absorbance at 600 nm. Concentration of insulin was 10  $\mu$ M, concentration of acridines was 60  $\mu$ M. Measurements were performed using Synergy MX (BioTek) spectrometer in a 96-well plate. The experiments were performed in triplicates and the reported values are the averages of measured values with standard deviation.

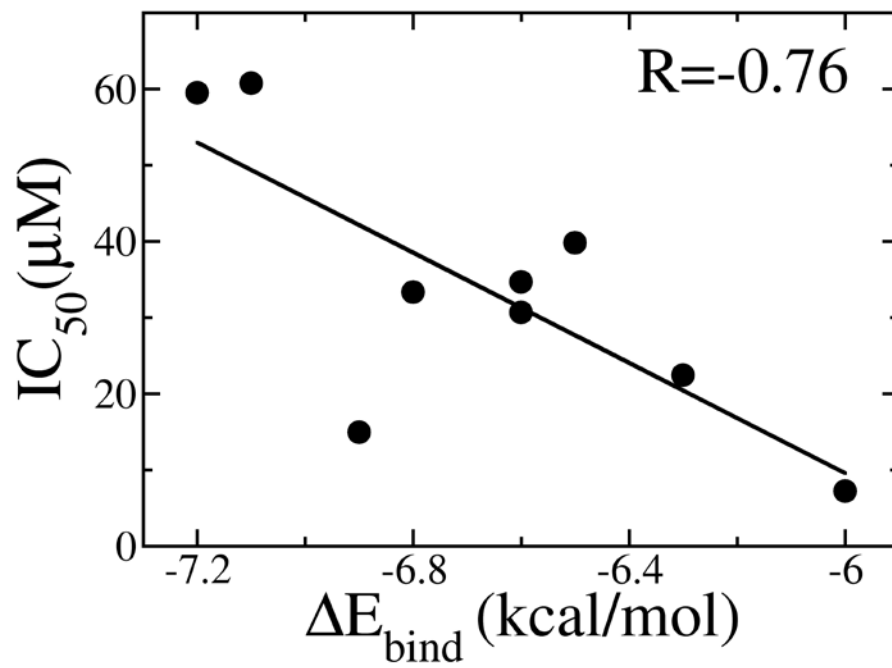

**Figure S2.** Correlation between experimentally determined  $IC_{50}$  values and binding energies obtained by the docking method. There are no error bars for  $\Delta E_{bind}$  as it was calculated for one snapshot of the best docking mode.

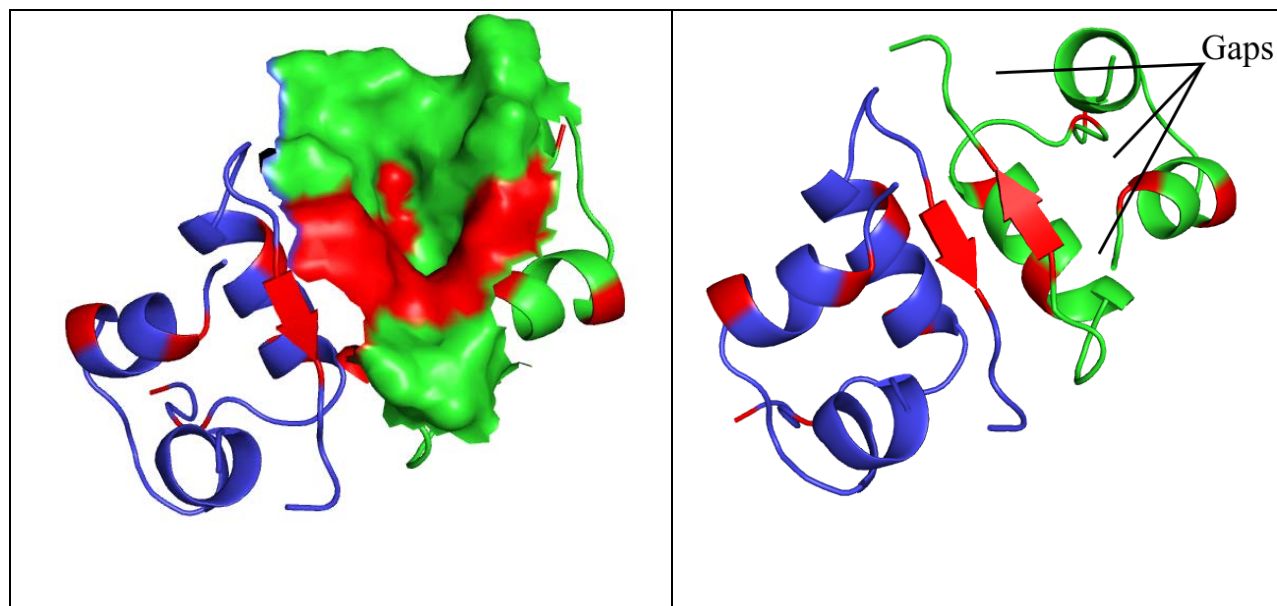

**Figure S3.** Binding pocket of insulin dimer, one monomer is in green, the other is in blue. HIS, PHE, TYR and TRP residues which have aromatic rings are in red. The flexible binding pocket including three gap points is located adjacently to the tangent of two monomers.

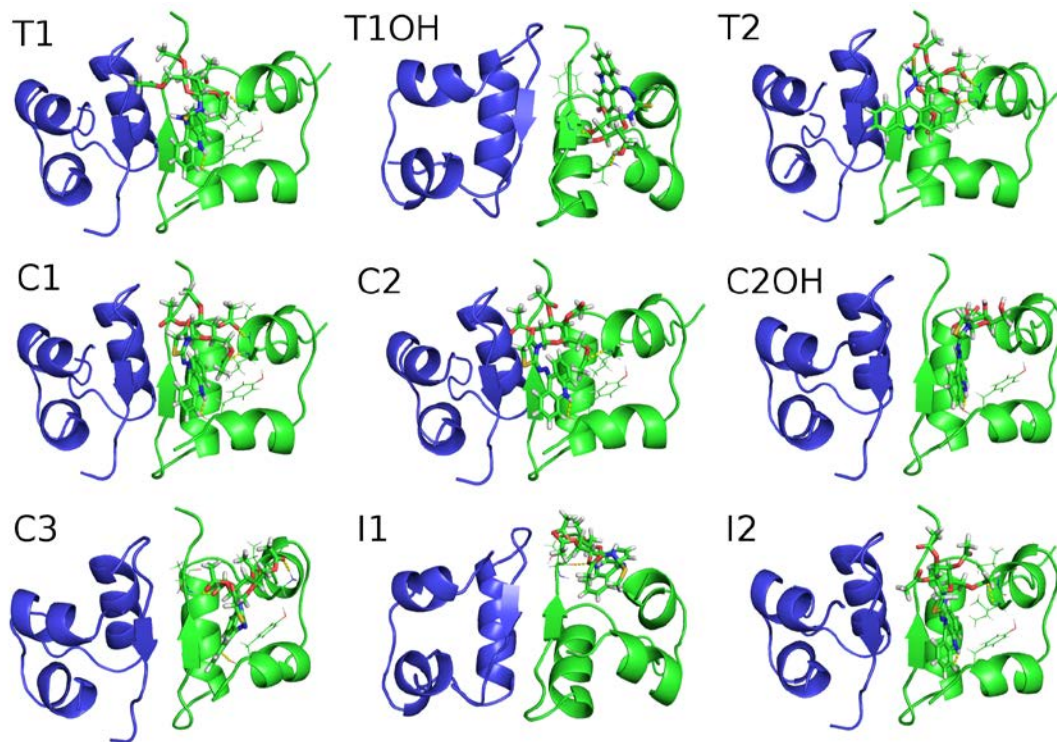

**Figure S4.** The docking poses of all glyco-acridine derivatives in complex with insulin dimer obtained in the best docking mode.

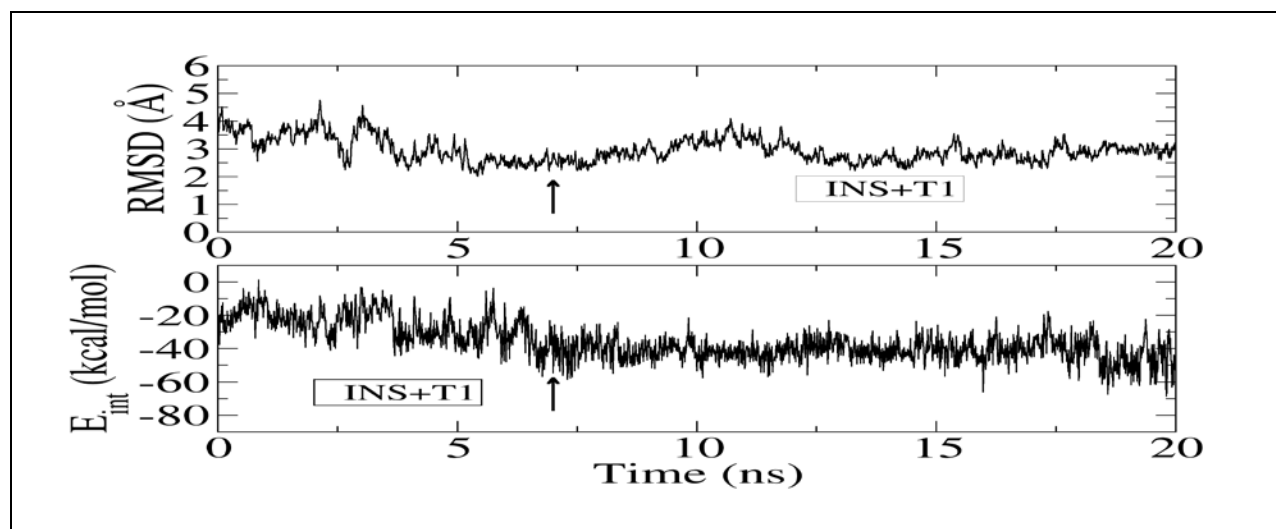

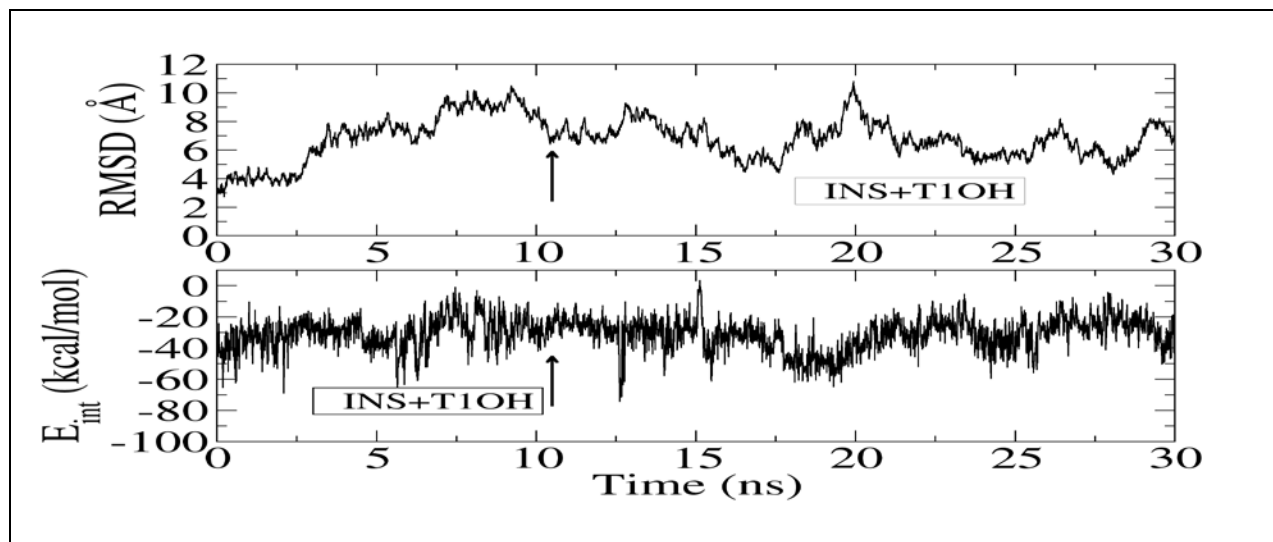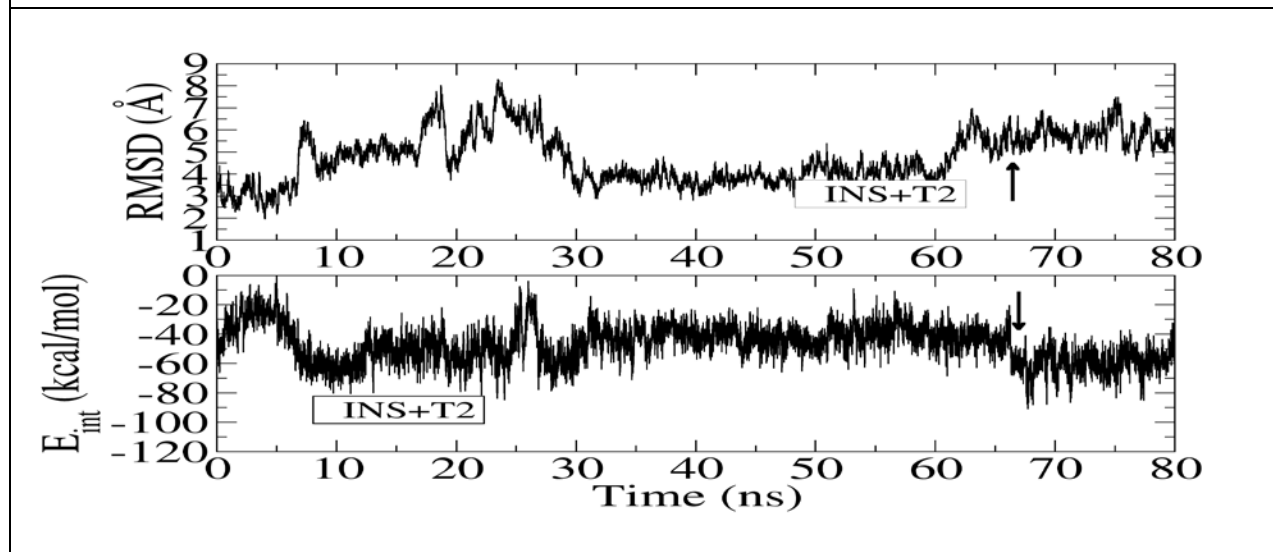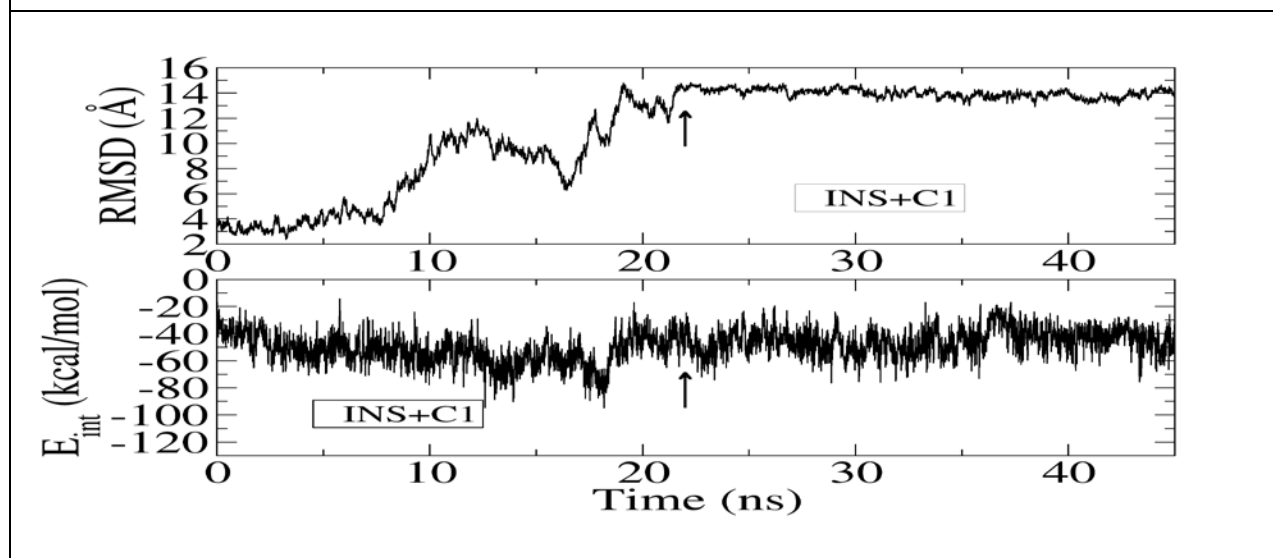



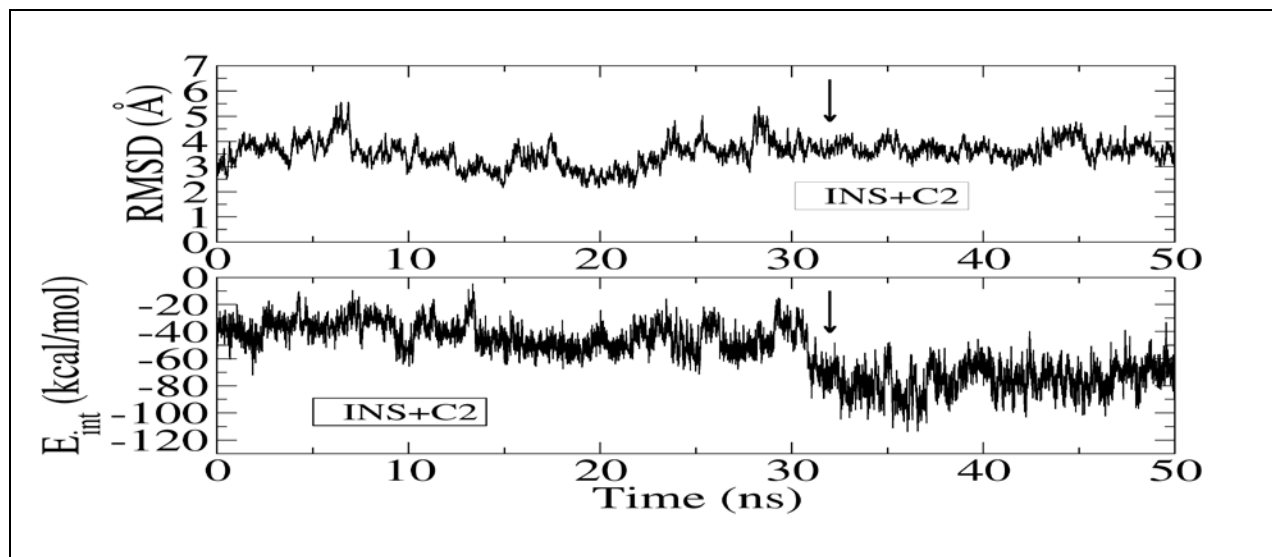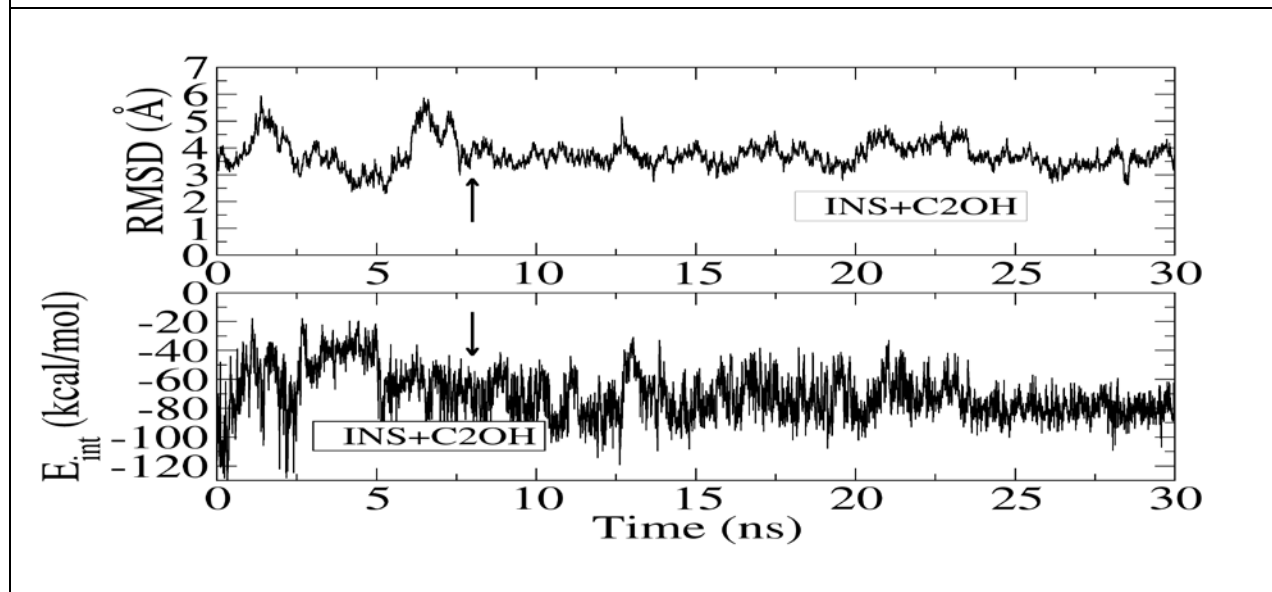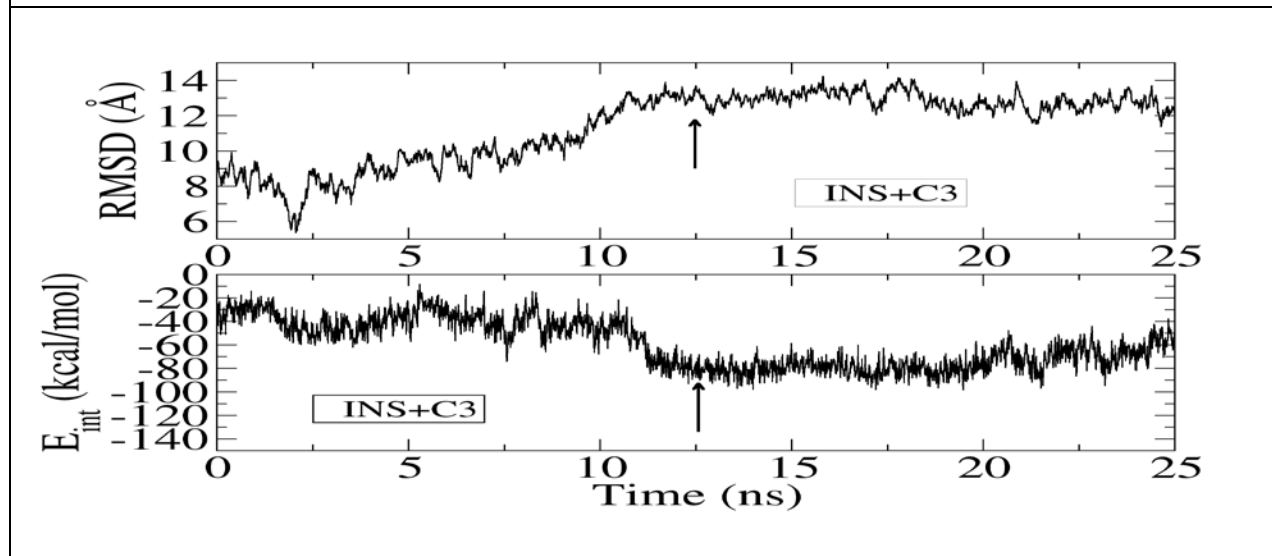

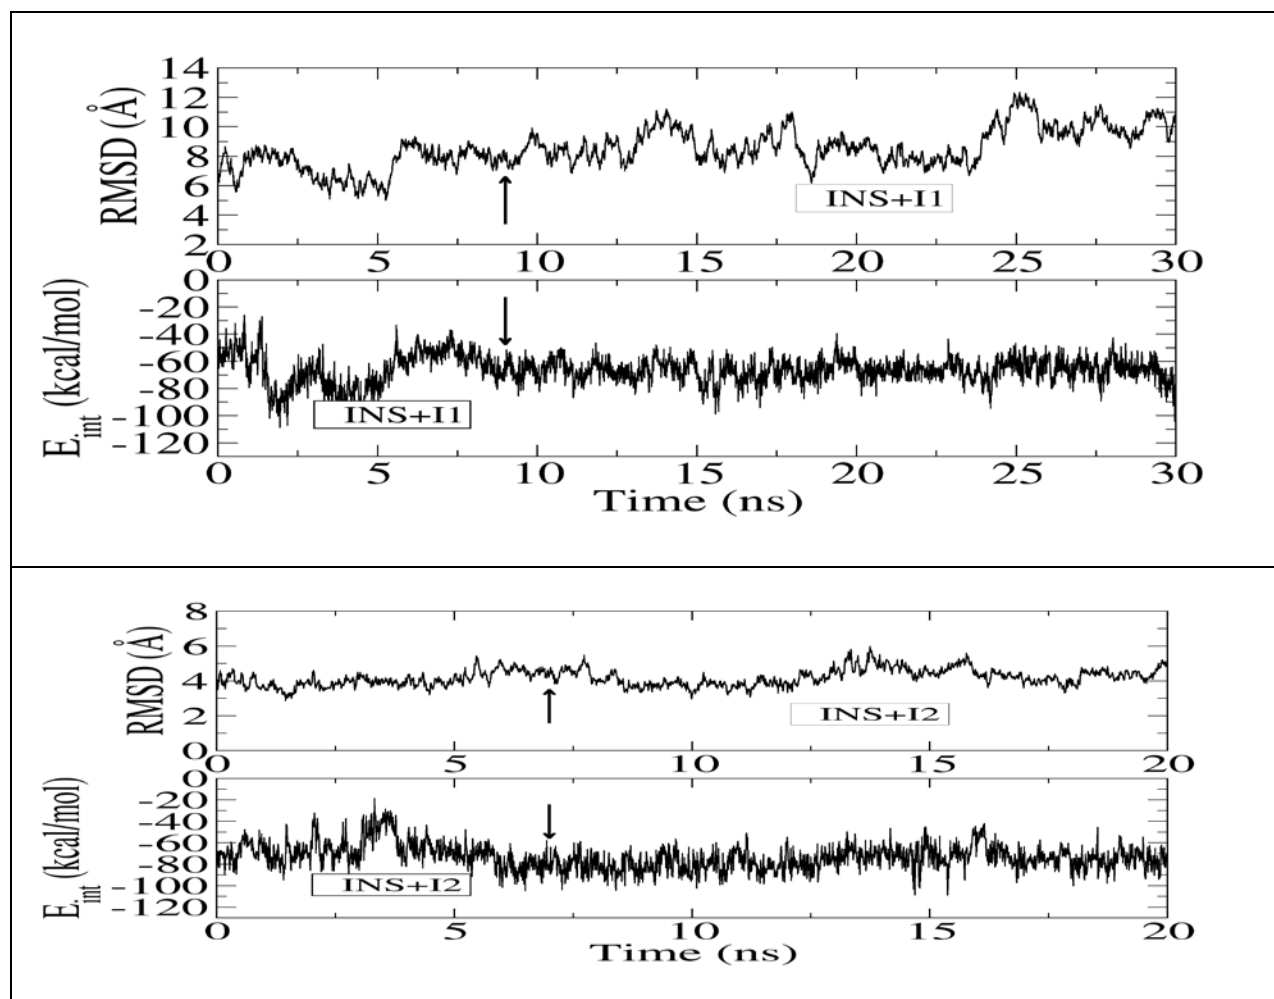

**Figure S5.** Time dependence of C $\alpha$  RMSD of insulin with respect to the PDB structure and the interaction energy of glyco-acridine derivatives with insulin. Arrow refers to time when the system reaches equilibrium.

**Table S2.** Free binding energy  $\Delta G_{\text{bind}}$  and hydrogen bond energy  $\Delta E_{\text{HB}}$  obtained in equilibrium from MD simulation.

| Ligands | $\Delta E_{\text{HB}}$ (kcal/mol) | $\Delta G_{\text{bind}}$ (kcal/mol) | IC <sub>50</sub> [ $\mu\text{M}$ ] |
|---------|-----------------------------------|-------------------------------------|------------------------------------|
| T1      | -28.4                             | -8.2                                | 39.79                              |
| T1OH    | -12.6                             | -2.2                                | 60.75                              |
| T2      | -33.4                             | -14.4                               | 22.44                              |
| C1      | -2.8                              | -8.3                                | 59.48                              |
| C2      | -1.7                              | -12.1                               | 34.64                              |
| C2OH    | -1.8                              | -18.4                               | 14.95                              |
| C3      | -8.7                              | -23.0                               | 30.67                              |
| I1      | -1.6                              | -23.9                               | 7.22                               |
| I2      | -13.7                             | -16.2                               | 33.31                              |

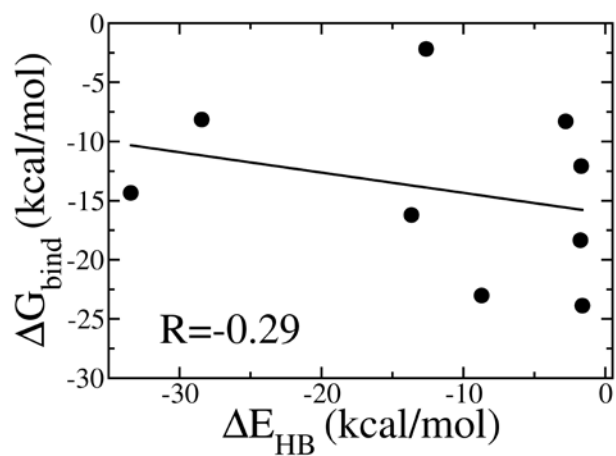

**Figure S6.** Correlation between  $\Delta G_{\text{bind}}$  and the hydrogen bond energy ( $\Delta E_{\text{HB}}$ ).

**Table S3.** van der Waals interaction energies of tricyclic core, linker and side chain of acridine ligands with the receptor. The energy is measured in kcal/mol.

| Ligands | Core  | Linker | Side chain | $\Delta G_{\text{bind}}$ |
|---------|-------|--------|------------|--------------------------|
| T1      | -16.5 | -8.6   | -11.2      | -8.2                     |
| T1OH    | -13.1 | -5.7   | -2.8       | -2.2                     |
| T2      | -24.1 | -7.0   | -13.8      | -14.4                    |
| C1      | -19.4 | -9.9   | -11.9      | -8.3                     |
| C2      | -18.0 | -3.9   | -24.6      | -12.1                    |
| C2OH    | -23.5 | -11.8  | -9.7       | -18.4                    |
| C3      | -23.8 | -12.4  | -19.8      | -23.0                    |
| I1      | -24.7 | -9.6   | -18.1      | -23.9                    |
| I2      | -21.0 | -7.9   | -19.7      | -16.2                    |

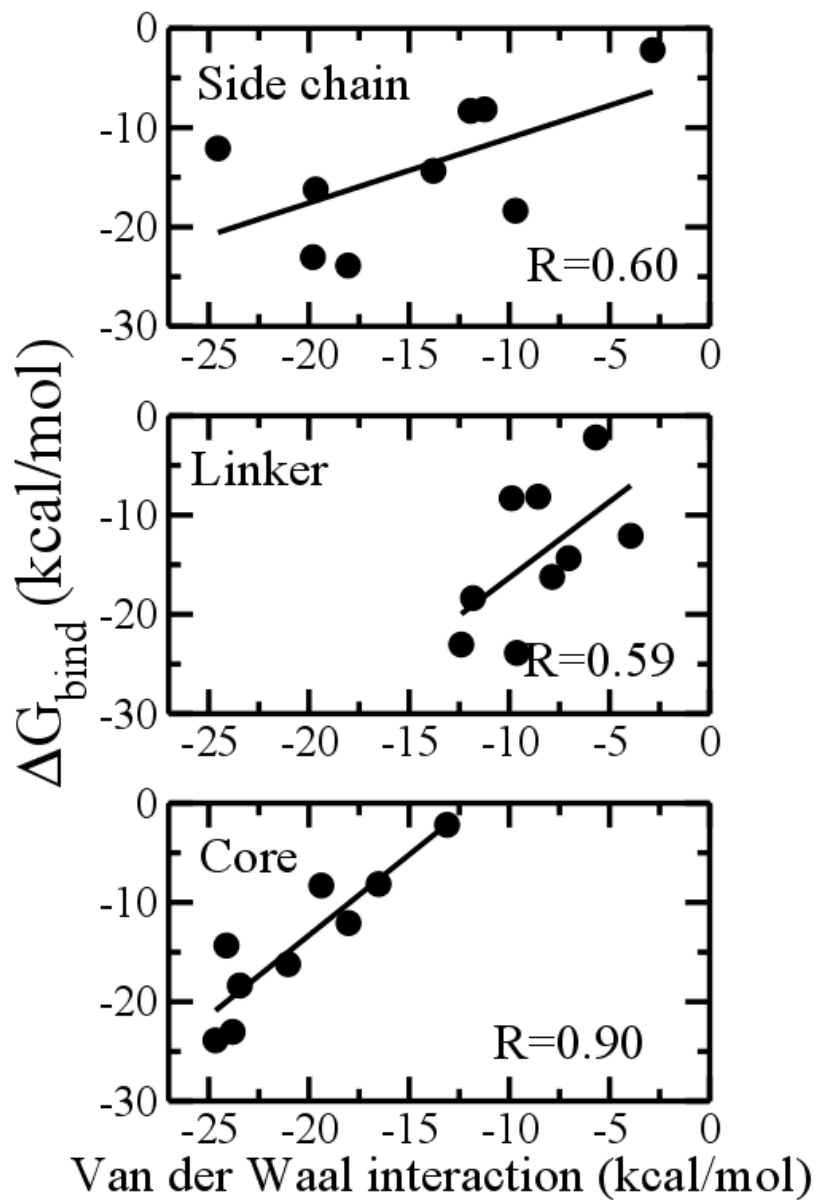

**Figure S7.** Correlation between the free binding energies  $\Delta G_{\text{bind}}$  and van der Waals interaction energies of tricyclic core, linker and side chain of glyco-acridine derivatives.

**Table S4.** Interaction energies between aromatic core part of ligands and aromatic rings of receptor,  $\Delta E_{\text{ar-ar}}$ ,  $\Delta E_{\text{vdw}}$  and  $\Delta E_{\text{elec}}$  are contribution of Van der Waal interaction and electrostatic interaction, respectively.

| Ligands | $\Delta E_{\text{vdw}}$ (Kcal/mol) | $\Delta E_{\text{elec}}$ (Kcal/mol) | $\Delta E_{\text{ar-ar}}$ (Kcal/mol) | $\Delta G_{\text{bind}}$ (Kcal/mol) |
|---------|------------------------------------|-------------------------------------|--------------------------------------|-------------------------------------|
| T1      | -0.9                               | 27.4                                | 26.5                                 | -8.2                                |
| T1OH    | -3.5                               | 16.7                                | 13.2                                 | -2.2                                |
| T2      | -8.4                               | 26.5                                | 18.1                                 | -14.6                               |
| C1      | -4.6                               | 17.0                                | 12.4                                 | -8.3                                |
| C2      | -7.2                               | 17.1                                | 9.9                                  | -12.1                               |
| C2OH    | -2.7                               | 18.9                                | 16.2                                 | -18.4                               |
| C3      | -4.7                               | 12.5                                | 7.8                                  | -23.0                               |
| I1      | -2.2                               | 16.8                                | 14.7                                 | -23.9                               |
| I2      | -4.2                               | 13.0                                | 8.8                                  | -16.2                               |

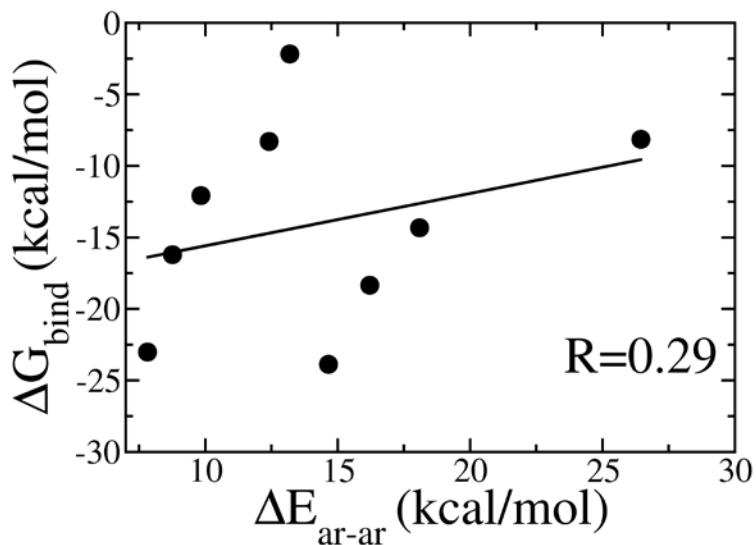

**Figure S8.** Correlation between the free binding energies and interaction energies between aromatic core part of ligands and aromatic rings of receptor,  $\Delta E_{\text{ar-ar}}$ .

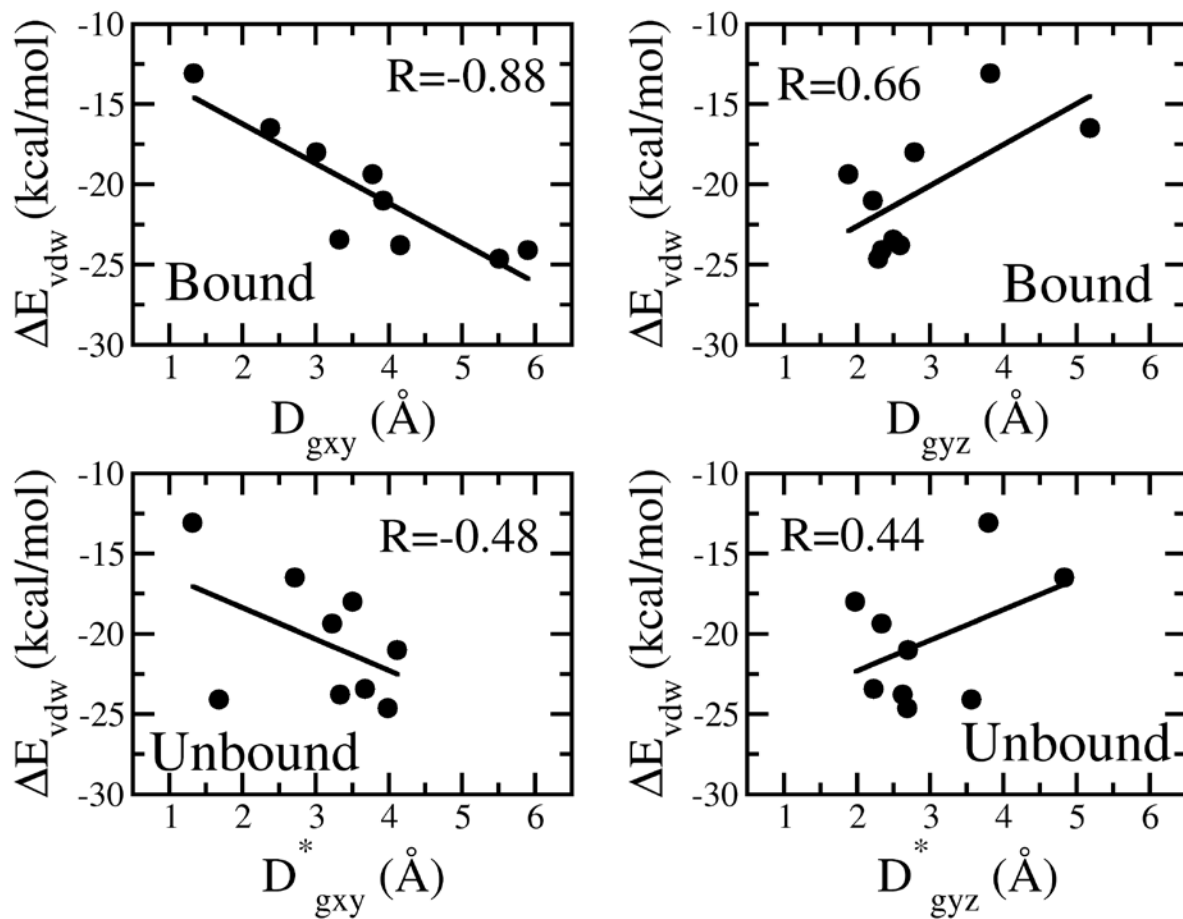

**Figure S9.** Correlation between the van der Waal interaction energy of tricyclic core and geometrical descriptors of glyco-acridine derivatives at bound and unbound states, \* indicates the unbound state.

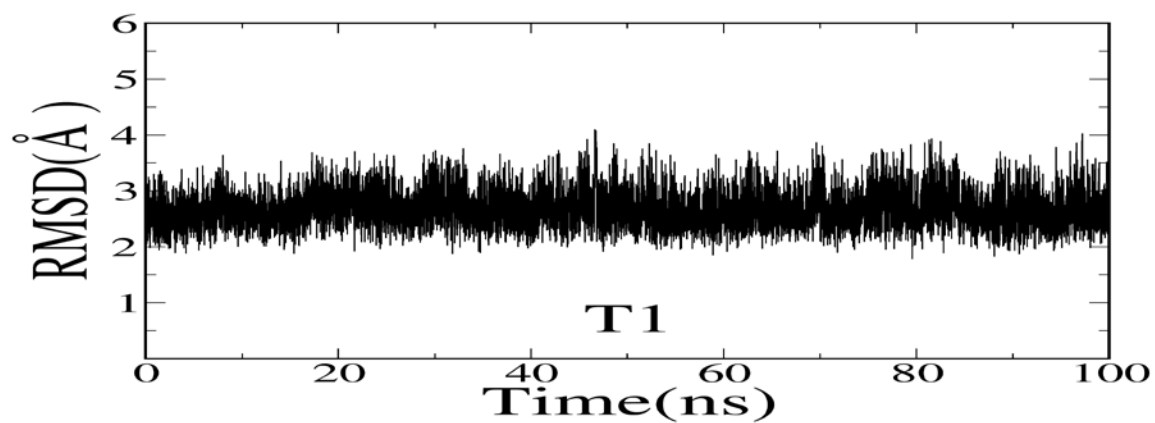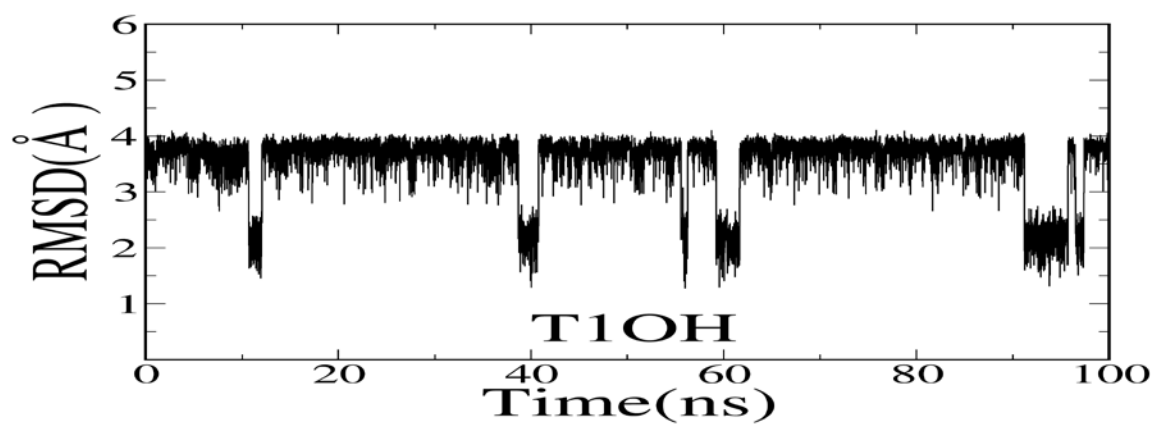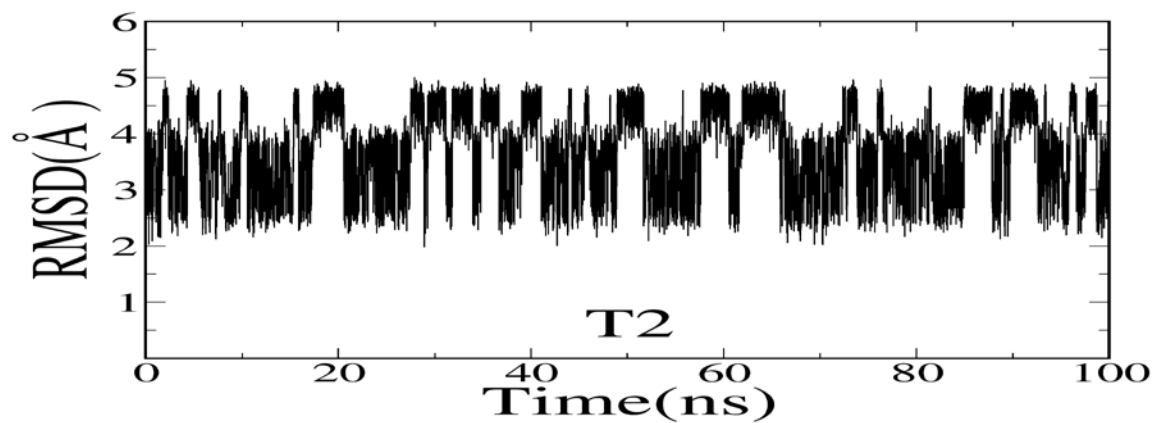



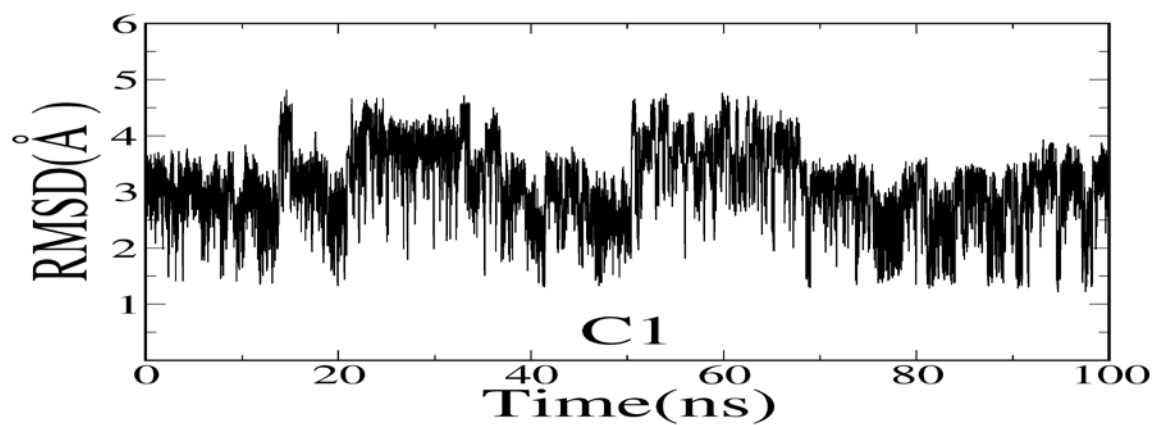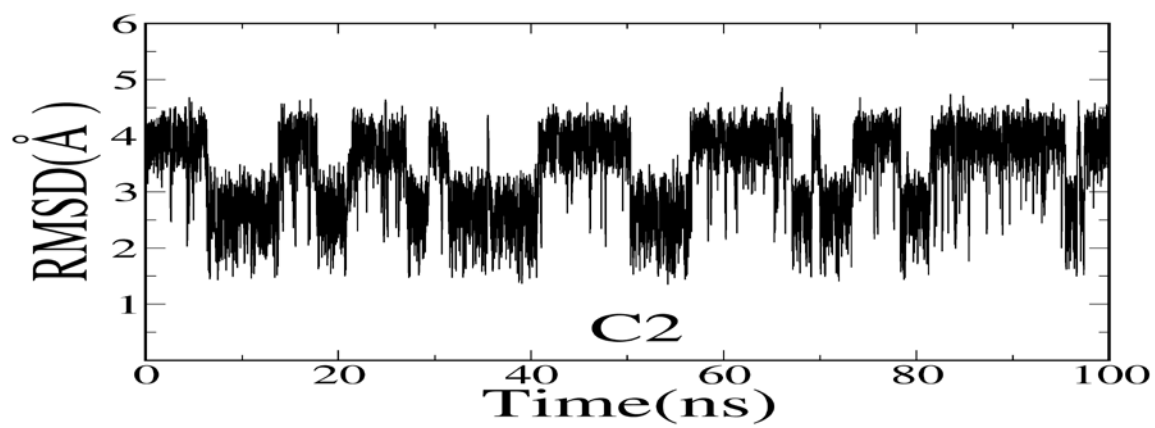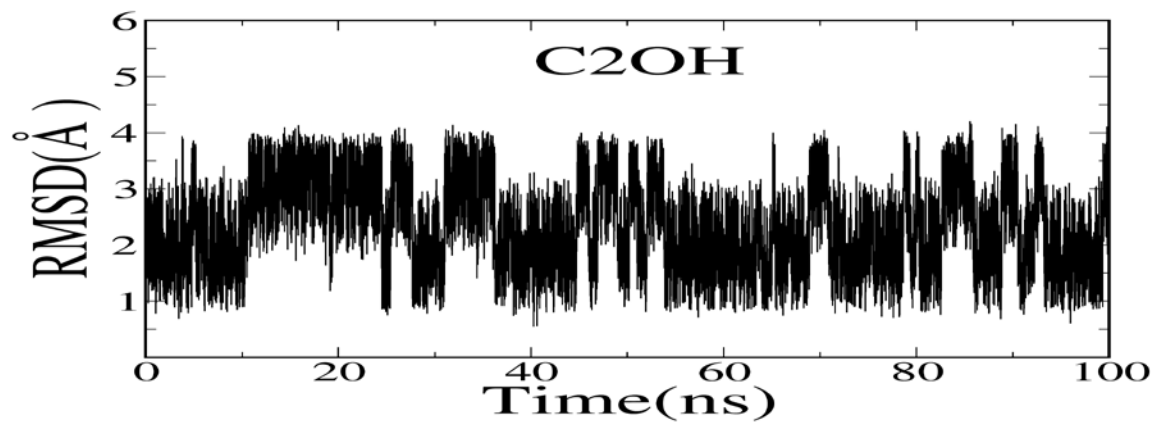

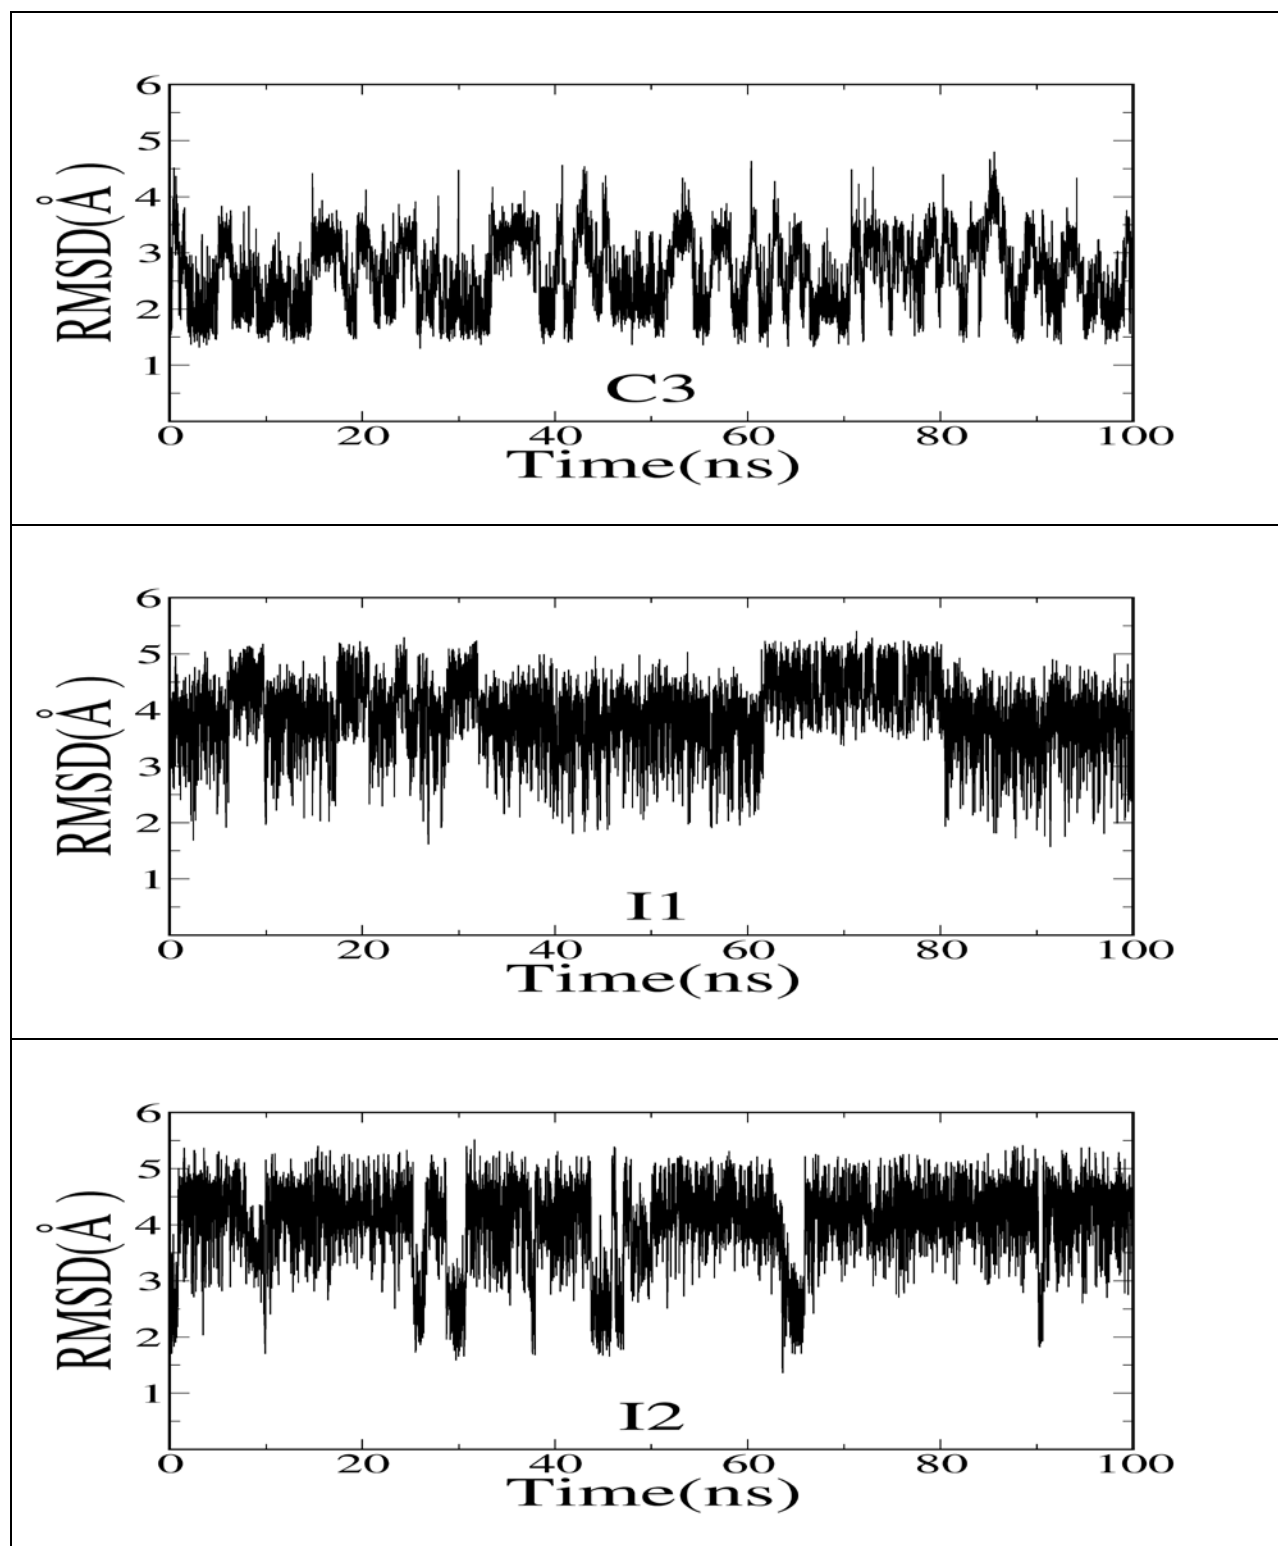

**Figure S10.** Time dependence of RMSD of glyco-acridine derivatives in unbound state.
